# Supplementary material for: Assessment of Oral Vancomycin-Induced Alterations in Gut Bacterial Microbiota and Metabolome of Healthy Men
Source: PubMed Central journal article supplement (PMC8190408; doi:10.3389/fcimb.2021.629438), 2021-05-27
Supplement: DataSheet_1.pdf [file DataSheet_1.pdf]

## Supplementary Material

### 1 Supplementary Figures and Tables

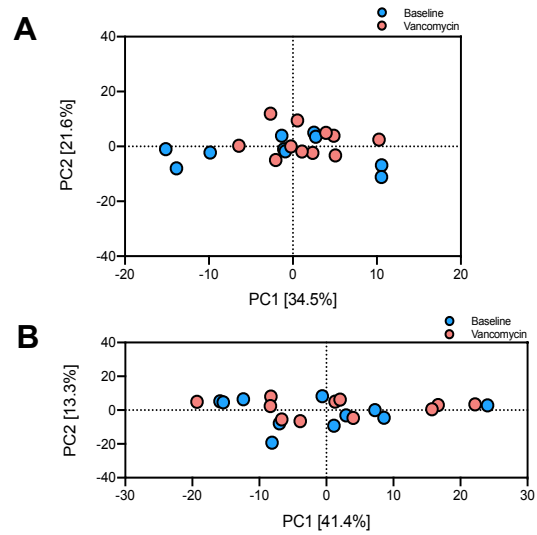

**Supplementary Figure 1.** Oral vancomycin induced alteration of plasma and urine metabolome. PCA plot derived from **(A)** plasma and **(B)** urine metabolomics analysis.

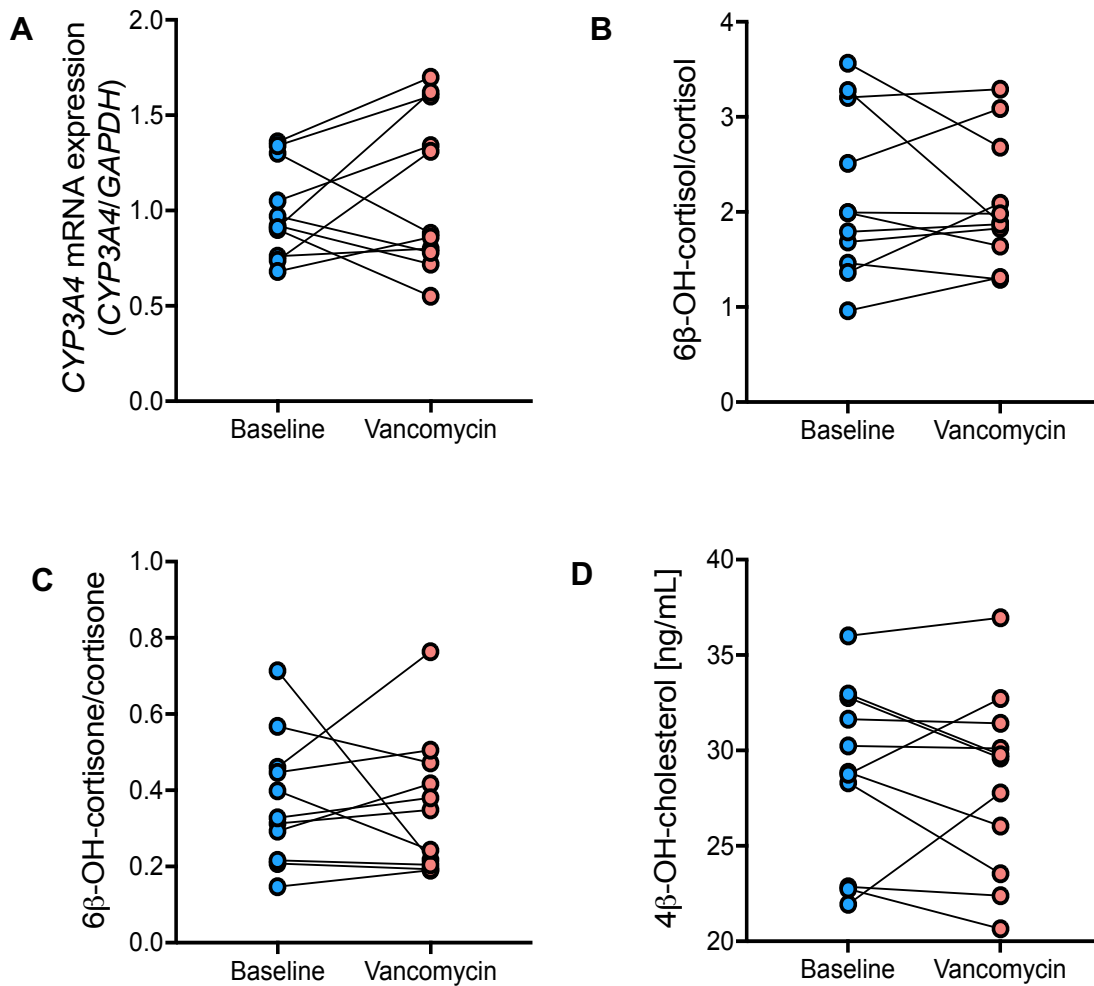

**Supplementary Figure 2.** Effect of oral vancomycin on the activity of CYP3A. Spaghetti plot derived from (A) *CYP3A4* mRNA expression, (B) 6 $\beta$ -OH-cortisol/cortisol, (C) 6 $\beta$ -OH-cortisone/cortisone, and (D) 4 $\beta$ -OH-cholesterol of Baseline and Vancomycin. Statistical analysis was performed using the Wilcoxon matched-pairs signed-rank test or paired t-test based on the Shapiro-Wilk normality test.

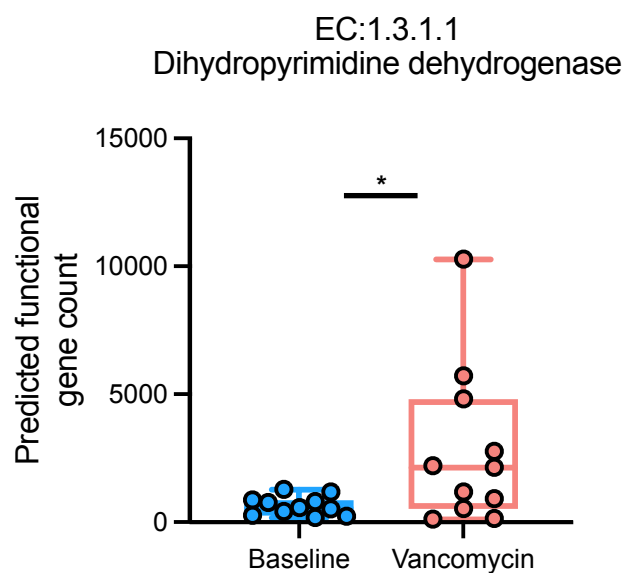

**Supplementary Figure 3.** Predicted functional gene count of DPD in Baseline and Vancomycin. Significantly higher (Wilcoxon matched-pairs signed-rank test,  $p$ -value = 0.0137) predicted functional gene count of DPD was observed in Vancomycin compared to that of Baseline. Statistical analysis was performed using the Wilcoxon matched-pairs signed-rank test.  $*p \leq 0.05$ ;  $**p \leq 0.01$ ;  $***p \leq 0.001$ ;  $****p \leq 0.0001$ .

**Supplementary Table 1.** Gut bacterial microbiota markers selected from LEfSe analysis.

| <b>Phylum</b>  | <b>Genus</b>             | <b>Mean abundance in Baseline</b> | <b>Mean abundance in Vancomycin</b> | <b>Fold change of Baseline/ Vancomycin</b> | <b>FDR adjusted p-value</b> | <b>LDA score</b> |
|----------------|--------------------------|-----------------------------------|-------------------------------------|--------------------------------------------|-----------------------------|------------------|
| Fusobacteria   | <i>Fusobacterium</i>     | 125390                            | 4059800                             | 0.0309                                     | 0.0119                      | 6.29             |
| Proteobacteria | <i>Escherichia</i>       | 50858                             | 876650                              | 0.0580                                     | 0.0016                      | 5.62             |
| Firmicutes     | <i>Lactobacillus</i>     | 302.89                            | 136550                              | 0.0022                                     | 0.0011                      | 4.83             |
| Proteobacteria | <i>Enterobacter</i>      | 994.57                            | 126860                              | 0.0078                                     | 0.0004                      | 4.8              |
| Proteobacteria | <i>Desulfovibrio</i>     | 5197.4                            | 110220                              | 0.0472                                     | 0.0351                      | 4.72             |
| Firmicutes     | <i>Intestinibacter</i>   | 5413.4                            | 20881                               | 0.2593                                     | 0.0481                      | 3.89             |
| Firmicutes     | <i>Granulicatella</i>    | 168.24                            | 1035.9                              | 0.1624                                     | 0.0189                      | 2.64             |
| Actinobacteria | <i>Collinsella</i>       | 13985                             | 12149                               | 1.1511                                     | 0.0042                      | -2.96            |
| Firmicutes     | <i>Agathobaculum</i>     | 2832                              | 13.054                              | 216.9450                                   | 0.0003                      | -3.15            |
| Firmicutes     | <i>Ihubacter</i>         | 3753.8                            | 391.36                              | 9.5917                                     | 0.0021                      | -3.23            |
| Firmicutes     | <i>Ruthenibacterium</i>  | 6700.8                            | 187.34                              | 35.7681                                    | 0.0013                      | -3.51            |
| Firmicutes     | <i>Flavonifractor</i>    | 8385.2                            | 13.054                              | 642.3472                                   | 0.0004                      | -3.62            |
| Firmicutes     | <i>Flintibacter</i>      | 9078.8                            | 43.485                              | 208.7800                                   | 0.0003                      | -3.66            |
| Firmicutes     | <i>Hespellia</i>         | 11350                             | 347.88                              | 32.6262                                    | 0.0047                      | -3.74            |
| Firmicutes     | <i>Turicibacter</i>      | 14583                             | 1454.5                              | 10.0261                                    | 0.0149                      | -3.82            |
| Firmicutes     | <i>Ruminococcus</i>      | 16334                             | 230.83                              | 70.7620                                    | 0.0026                      | -3.91            |
| Firmicutes     | <i>Coprococcus</i>       | 19570                             | 443.93                              | 44.0835                                    | 0.0038                      | -3.98            |
| Firmicutes     | <i>Lachnoclostridium</i> | 20269                             | 56.89                               | 356.2841                                   | 0.0003                      | -4               |

|                |                               |         |        |           |        |       |
|----------------|-------------------------------|---------|--------|-----------|--------|-------|
| Firmicutes     | <i>Roseburia</i>              | 24743   | 0      |           | 0.0007 | -4.09 |
| Firmicutes     | <i>Anaerostipes</i>           | 27419   | 156.56 | 175.1341  | 0.0003 | -4.13 |
| Firmicutes     | <i>Hungateiclostridium</i>    | 28449   | 43.485 | 654.2256  | 0.0012 | -4.15 |
| Firmicutes     | <i>Erysipelatoclostridium</i> | 28760   | 21.133 | 1360.9047 | 0.0088 | -4.16 |
| Firmicutes     | <i>Eubacterium</i>            | 38180   | 1187.5 | 32.1516   | 0.0003 | -4.27 |
| Firmicutes     | <i>Kineothrix</i>             | 41672   | 331.92 | 125.5483  | 0.0003 | -4.32 |
| Firmicutes     | <i>Fusicatenibacter</i>       | 44120   | 0      |           | 0.0003 | -4.34 |
| Actinobacteria | <i>Bifidobacterium</i>        | 47447   | 281.78 | 168.3831  | 0.0016 | -4.37 |
| Bacteroidetes  | <i>Odoribacter</i>            | 64560   | 1703.5 | 37.8984   | 0.0125 | -4.5  |
| Firmicutes     | <i>Dorea</i>                  | 66101   | 217.42 | 304.0245  | 0.0003 | -4.52 |
| Firmicutes     | <i>Gemmiger</i>               | 100020  | 408.09 | 245.0930  | 0.0007 | -4.7  |
| Firmicutes     | <i>Oscillibacter</i>          | 106690  | 1004.6 | 106.2015  | 0.0003 | -4.72 |
| Firmicutes     | <i>Romboutsia</i>             | 121190  | 9121.8 | 13.2858   | 0.0017 | -4.75 |
| Firmicutes     | <i>Clostridioides</i>         | 141310  | 301.89 | 468.0844  | 0.0003 | -4.85 |
| Proteobacteria | <i>Haemophilus</i>            | 182560  | 2594.9 | 70.3534   | 0.0158 | -4.95 |
| Bacteroidetes  | <i>Parabacteroides</i>        | 277980  | 444.63 | 625.1940  | 0.0003 | -5.14 |
| Bacteroidetes  | <i>Barnesiella</i>            | 299090  | 3913.6 | 76.4232   | 0.0107 | -5.17 |
| Firmicutes     | <i>Blautia</i>                | 439370  | 17616  | 24.9415   | 0.0003 | -5.32 |
| Firmicutes     | <i>Faecalibacterium</i>       | 661050  | 15290  | 43.2341   | 0.0003 | -5.51 |
| Bacteroidetes  | <i>Alistipes</i>              | 1115500 | 12013  | 92.8577   | 0.0005 | -5.74 |
| Bacteroidetes  | <i>Bacteroides</i>            | 4003900 | 2693.3 | 1486.6149 | 0.0003 | -6.3  |
